# Supplementary material for: AuNP based selective colorimetric sensor for cysteine at a wide pH range: investigation of capping molecule structure on the colorimetric sensing and catalytic properties
Source: Royal Society of Chemistry journal article supplement (doi:10.1039/c4ra00345d), 2014-01-01
Supplement: c4ra00345d1.pdf [file c4ra00345d1.pdf]

**AuNPs based selective colorimetric sensor for cysteine at wide pH range:  
Investigation of capping molecule structure on the colorimetric sensing and  
catalytic properties**

V. Vinod Kumar and Savarimuthu Philip Anthony\*

School of chemical & Biotechnology, SASTRA University, Thanjavur-613 403,  
Tamil Nadu, India

Phone: +914362264101: Fax: +914362264120

E-mail: [philip@biotech.sastra.edu](mailto:philip@biotech.sastra.edu)

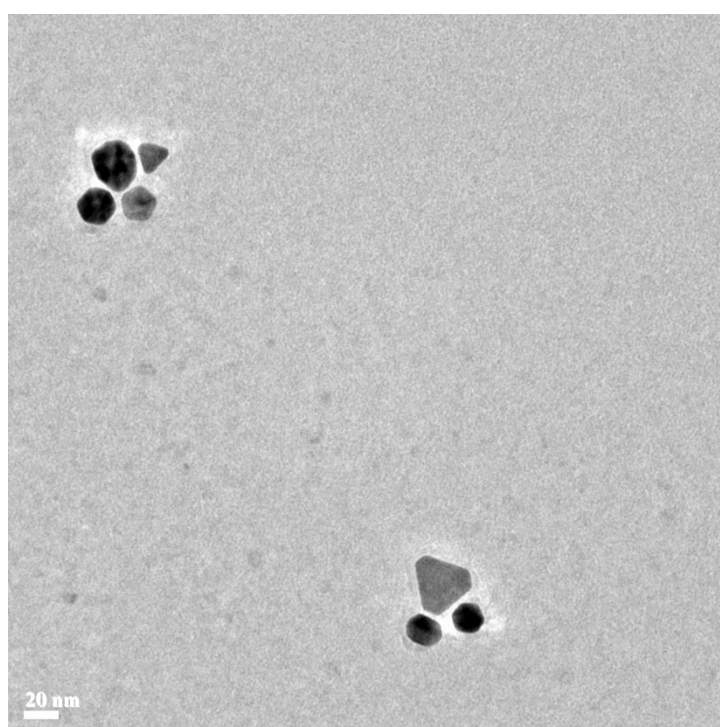

Figure S1. HR-TEM image of SDS-AuNPs.

Table 1. Zeta potential of AuNPs stabilized with different capping agents.

| Compound   | Zeta potential (mV) |
|------------|---------------------|
| SDS-AgNPs  | -71.3               |
| PEG-AgNPs  | -14.4               |
| PVA-AgNPs  | -11.8               |
| PVP-AgNPs  | -12.4               |
| PSS-AgNPs  | -29.9               |
| T-80-AgNPs | -13.9               |

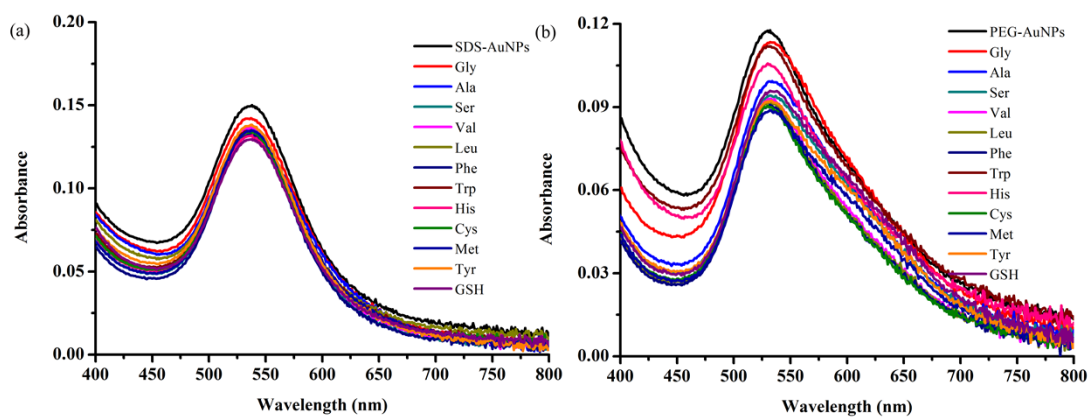

Figure S2. Absorption spectra of (a) SDS- and (b) PEG-AuNPs with different amino acids.

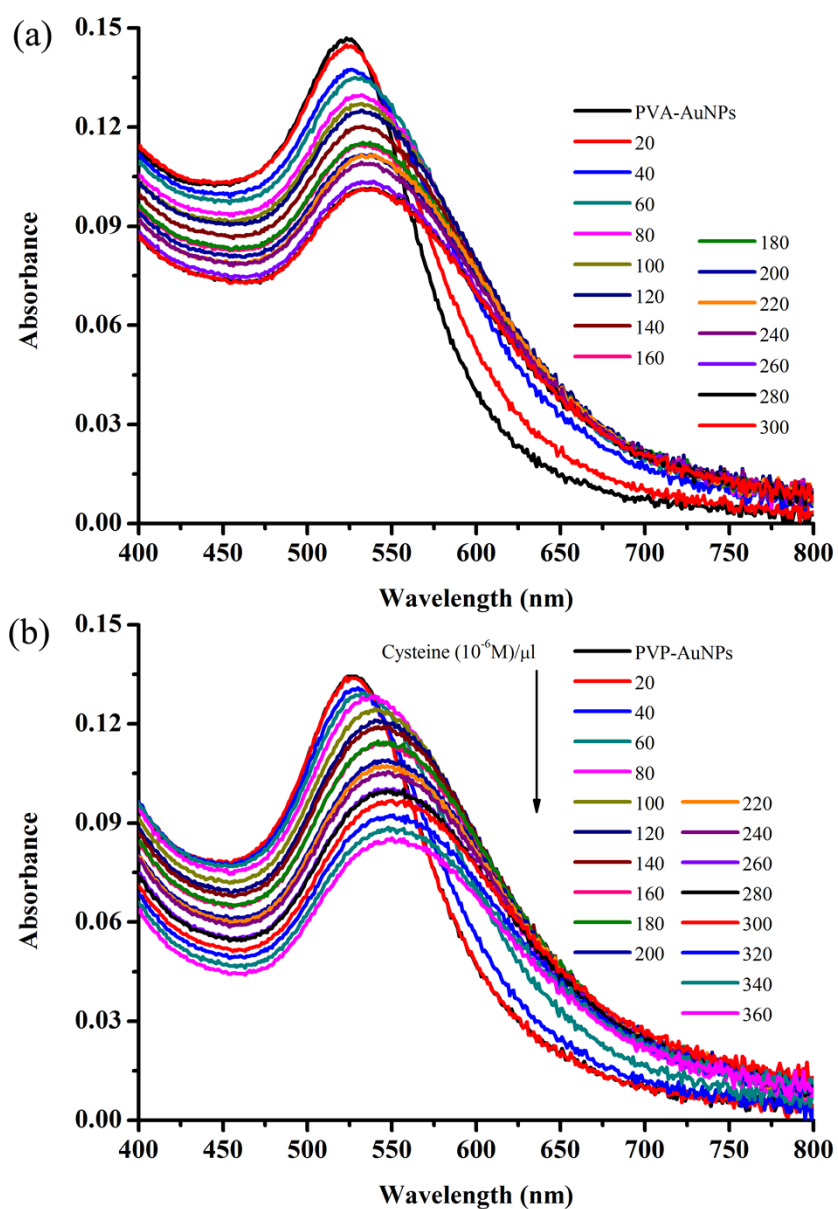

Figure S3. Change of absorption (a) PVA-AuNPs Vs cysteine and (b) PVP-AuNPs Vs cysteine.

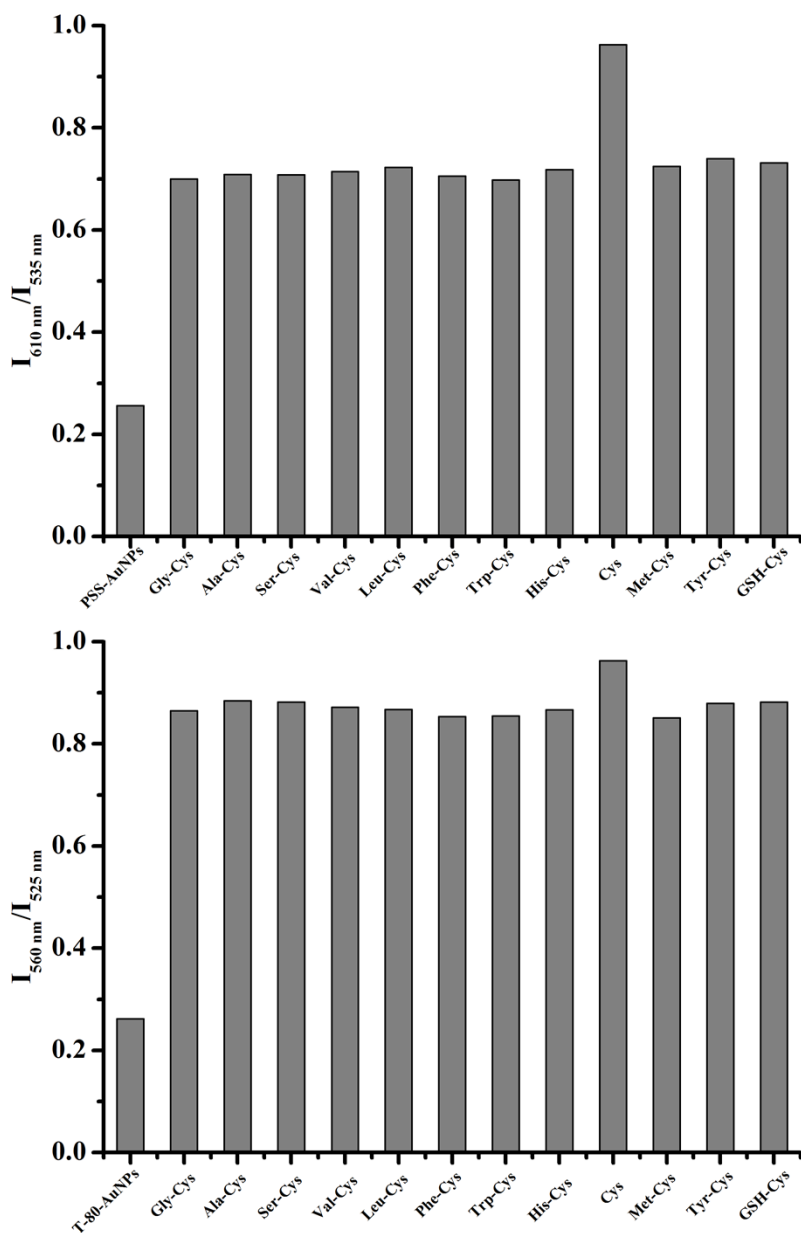

Figure S4. Cysteine colorimetric sensing (a) PSS- and (b) T-80-AuNPs in presence of different amino acids.

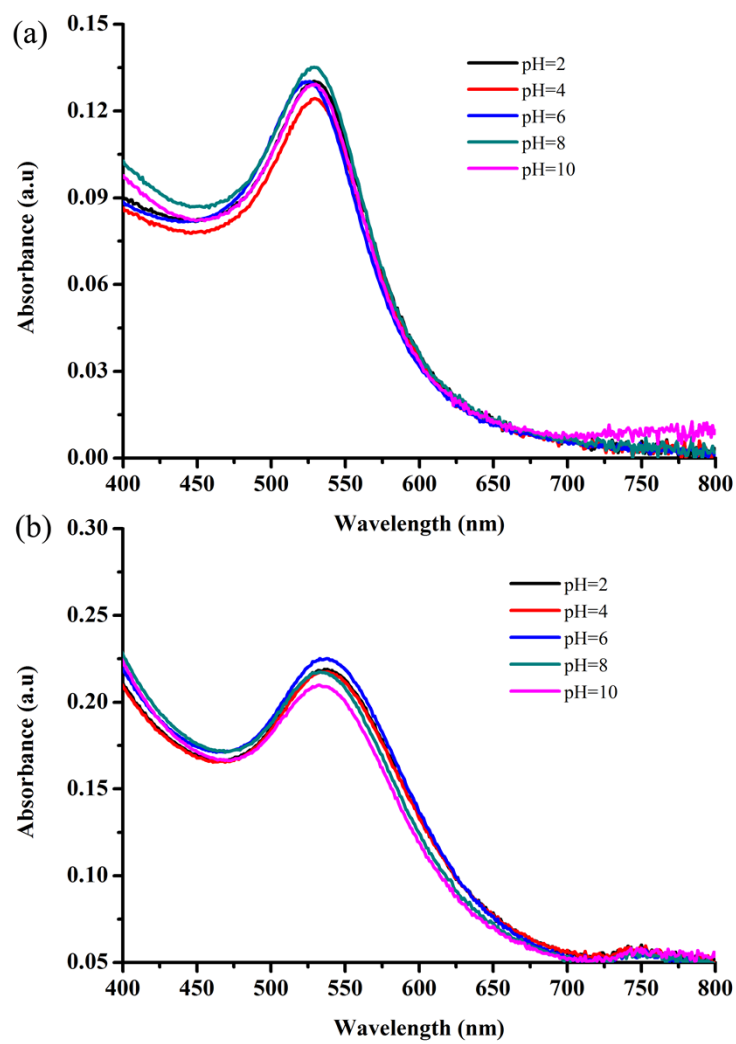

Figure S5. Absorption spectra of (a) T-80- and (b) PSS-AuNPs at different *pH*.

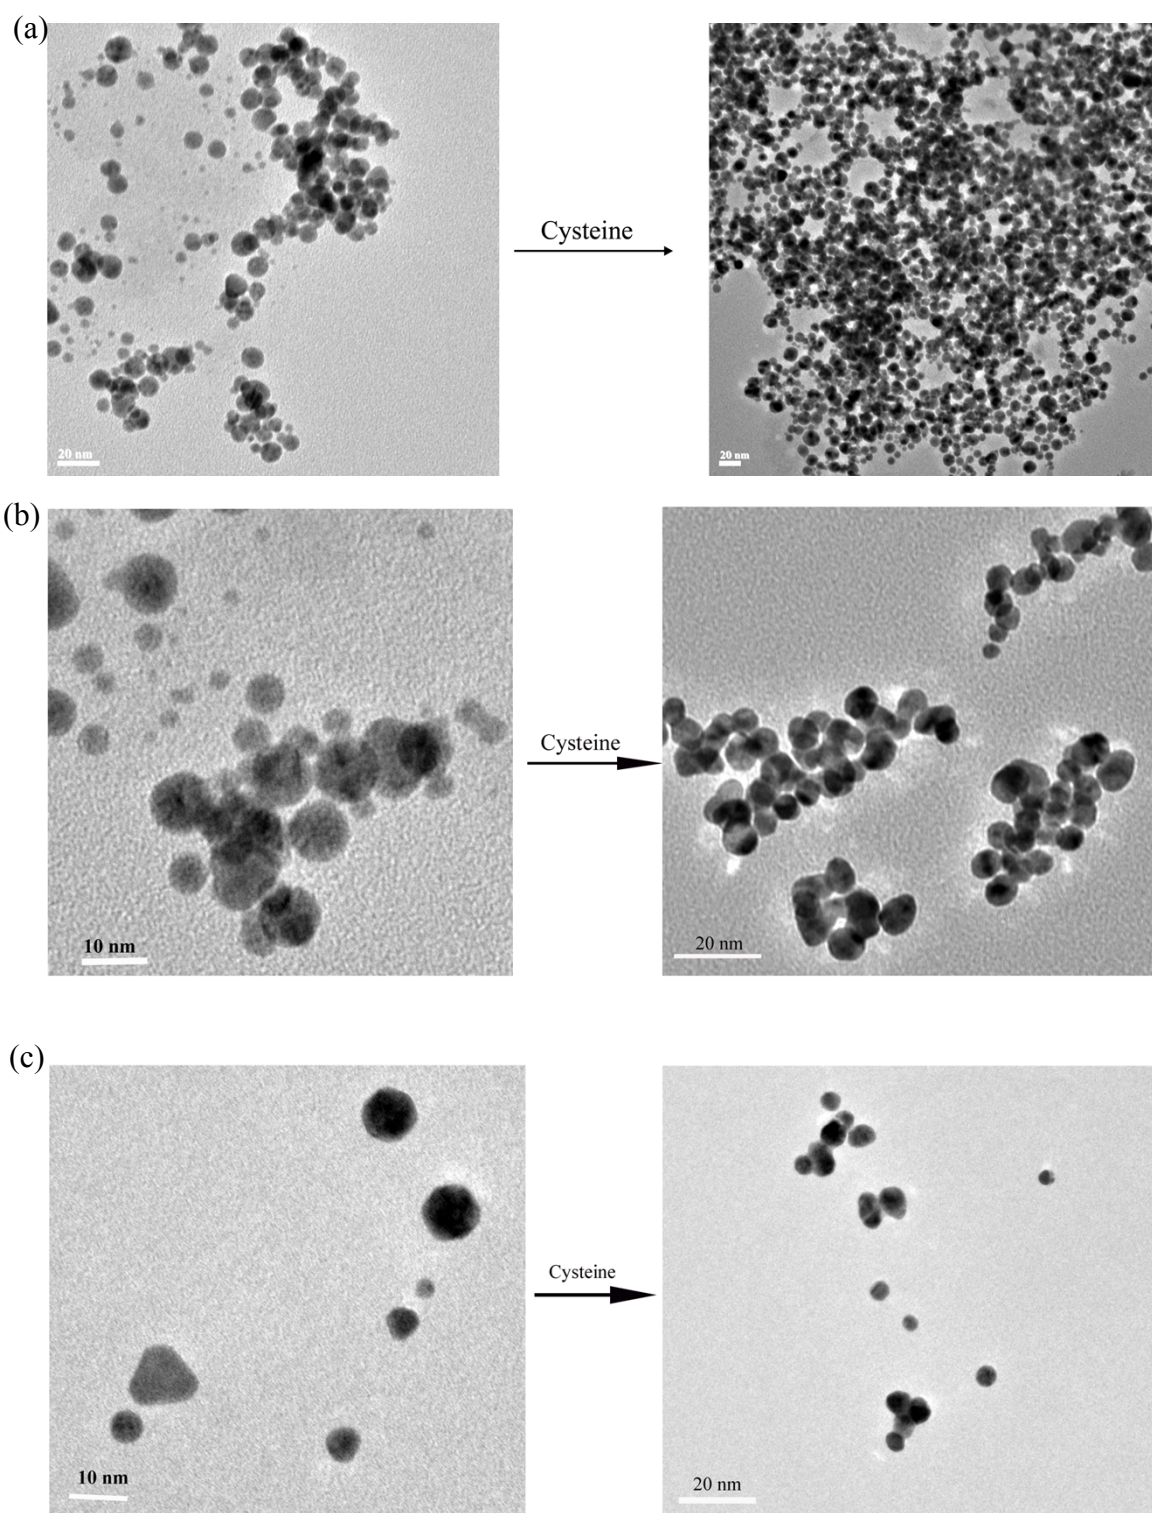

Figure S6. HR-TEM images of AuNPs of before and after addition of cysteine to (a) SDS-AuNPs (b) PVP-AuNPs and (c) T-80-AuNPs.
